# Supplementary material
Source: HighWire-hosted journal article supplement (https://erj.ersjournals.com/content/59/3/2101925)

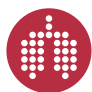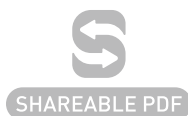

# Drug exposure and susceptibility of second-line drugs correlate with treatment response in patients with multidrug-resistant tuberculosis: a multicentre prospective cohort study in China

Xubin Zheng<sup>1</sup>, Lina Davies Forsman<sup>2,3</sup>, Ziwei Bao<sup>4</sup>, Yan Xie<sup>5</sup>, Zhu Ning<sup>5</sup>, Thomas Schön<sup>6,7</sup>, Judith Bruchfeld<sup>2,3</sup>, Biao Xu<sup>1</sup>, Jan-Willem Alffenaar<sup>8,9,10,11</sup> and Yi Hu<sup>1,11</sup>

<sup>1</sup>Dept of Epidemiology, School of Public Health and Key Laboratory of Public Health Safety, Fudan University, Shanghai, China. <sup>2</sup>Division of Infectious Diseases, Dept of Medicine, Solna, Karolinska Institutet, Stockholm, Sweden. <sup>3</sup>Dept of Infectious Disease, Karolinska University Hospital, Stockholm, Sweden. <sup>4</sup>The Fifth People's Hospital of Suzhou, Suzhou, China. <sup>5</sup>Zigong Centre for Disease Control and Prevention, Zigong, China. <sup>6</sup>Dept of Infectious Diseases, Linköping University Hospital and Kalmar County Hospital, Linköping, Sweden. <sup>7</sup>Division of Inflammation and Infectious Diseases, Dept of Biomedical and Clinical Sciences, Linköping University, Linköping, Sweden. <sup>8</sup>Sydney Institute of Infectious Diseases, University of Sydney, Sydney, Australia. <sup>9</sup>Faculty of Medicine and Health, School of Pharmacy, University of Sydney, Sydney, Australia. <sup>10</sup>Westmead Hospital, Sydney, Australia. <sup>11</sup>J-W. Alffenaar and Y. Hu contributed equally.

Corresponding author: Yi Hu (yhu@fudan.edu.cn)

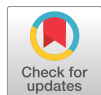

Shareable abstract (@ERSpublications)

**Drug exposure and susceptibility were proved to be associated with treatment responses during multidrug-resistant tuberculosis treatment, and identified thresholds may serve as targets for dose adjustment in future clinical studies to improve treatment efficacy** <https://bit.ly/3pZQbFU>

**Cite this article as:** Zheng X, Davies Forsman L, Bao Z, et al. Drug exposure and susceptibility of second-line drugs correlate with treatment response in patients with multidrug-resistant tuberculosis: a multicentre prospective cohort study in China. *Eur Respir J* 2022; 59: 2101925 [DOI: 10.1183/13993003.01925-2021].

This single-page version can be shared freely online.

Copyright ©The authors 2022.

This version is distributed under the terms of the Creative Commons Attribution Non-Commercial Licence 4.0. For commercial reproduction rights and permissions contact [permissions@ersnet.org](mailto:permissions@ersnet.org)

This article has an editorial commentary:  
<https://doi.org/10.1183/13993003.00149-2022>

Received: 9 July 2021  
Accepted: 21 Oct 2021

## Abstract

**Background** Understanding the impact of drug exposure and susceptibility on treatment response of multidrug-resistant tuberculosis (MDR-TB) will help to optimise treatment. This study aimed to investigate the association between drug exposure, susceptibility and response to MDR-TB treatment.

**Methods** Drug exposure and susceptibility for second-line drugs were measured for patients with MDR-TB. Multivariate analysis was applied to investigate the impact of drug exposure and susceptibility on sputum culture conversion and treatment outcome. Probability of target attainment was evaluated. Random Forest and CART (Classification and Regression Tree) analysis was used to identify key predictors and their clinical targets among patients on World Health Organization-recommended regimens.

**Results** Drug exposure and corresponding susceptibility were available for 197 patients with MDR-TB. The probability of target attainment was highly variable, ranging from 0% for ethambutol to 97% for linezolid, while patients with fluoroquinolones above targets had a higher probability of 2-month culture conversion (56.3% versus 28.6%; adjusted OR 2.91, 95% CI 1.42–5.94) and favourable outcome (88.8% versus 68.8%; adjusted OR 2.89, 95% CI 1.16–7.17). Higher exposure values of fluoroquinolones, linezolid and pyrazinamide were associated with earlier sputum culture conversion. CART analysis selected moxifloxacin area under the drug concentration–time curve/minimum inhibitory concentration ( $AUC_{0-24h}/MIC$ ) of 231 and linezolid  $AUC_{0-24h}/MIC$  of 287 as best predictors for 6-month culture conversion in patients receiving identical Group A-based regimens. These associations were confirmed in multivariate analysis.

**Conclusions** Our findings indicate that target attainment of TB drugs is associated with response to treatment. The CART-derived thresholds may serve as targets for early dose adjustment in a future randomised controlled study to improve MDR-TB treatment outcome.

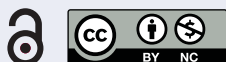

Supplement: inline-supplementary-material-2 [file inline-supplementary-material-2.pdf]
